# Supplementary material for: Improved fill factor in inverted planar perovskite solar cells with zirconium acetate as the hole-and-ion-blocking layer
Source: Royal Society of Chemistry journal article supplement (doi:10.1039/c8cp00563j), 2018-01-01
Supplement: c8cp00563j1.pdf [file c8cp00563j1.pdf]

### Supplementary Information

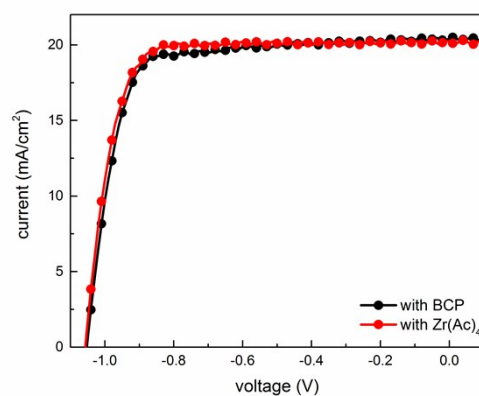

**Fig S1.** The J-V characteristics of the optimized devices with Zr(Ac)<sub>4</sub> and BCP, respectively, as the buffer layer.

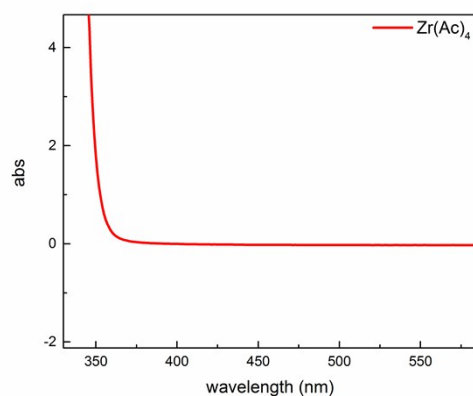

**Fig S2.** UV-vis absorption edge of Zr(Ac)<sub>4</sub> film.

Table S1. The photovoltaic parameters (from Fig. S1) of the PSCs with different buffer layer.

|                          | V <sub>oc</sub> (V) | J <sub>sc</sub> (mA/cm <sup>2</sup> ) | FF (%) | PCE (%) |
|--------------------------|---------------------|---------------------------------------|--------|---------|
| with BCP                 | 1.05                | 20.42                                 | 77.4   | 16.6    |
| with Zr(Ac) <sub>4</sub> | 1.06                | 20.23                                 | 79.6   | 17.1    |
